# Supplementary material for: Transcriptomic Profiling of Tomato Leaves Identifies Novel Transcription Factors Responding to Dehydration Stress
Source: MDPI journal article supplement (doi:10.3390/ijms24119725), 2023-06-03

# Transcriptomic profiling identifies novel transcription factors involving drought response in tomato

Shuchao Dong<sup>1,2</sup>, Jiayi Lin<sup>1,3</sup>, Liuxia Song<sup>1,2</sup>, Liping Zhao<sup>1,2</sup>, Yinlei Wang<sup>1,2</sup>, and Tongmin Zhao<sup>1,2§</sup>

<sup>1</sup>Institute of Vegetable Crop, Jiangsu Academy of Agricultural Sciences, Nanjing 210014, China;

<sup>2</sup>Jiangsu Key Laboratory for Horticultural Crop Genetic Improvement, Nanjing 210014, China; <sup>3</sup>College of Horticulture and Plant Protection, Yangzhou University, Yangzhou 225100, China

§Corresponding author: Tongmin Zhao: tmzhaomail@163.com

Figure S1

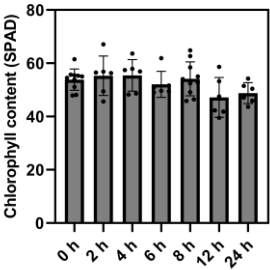

Figure S2

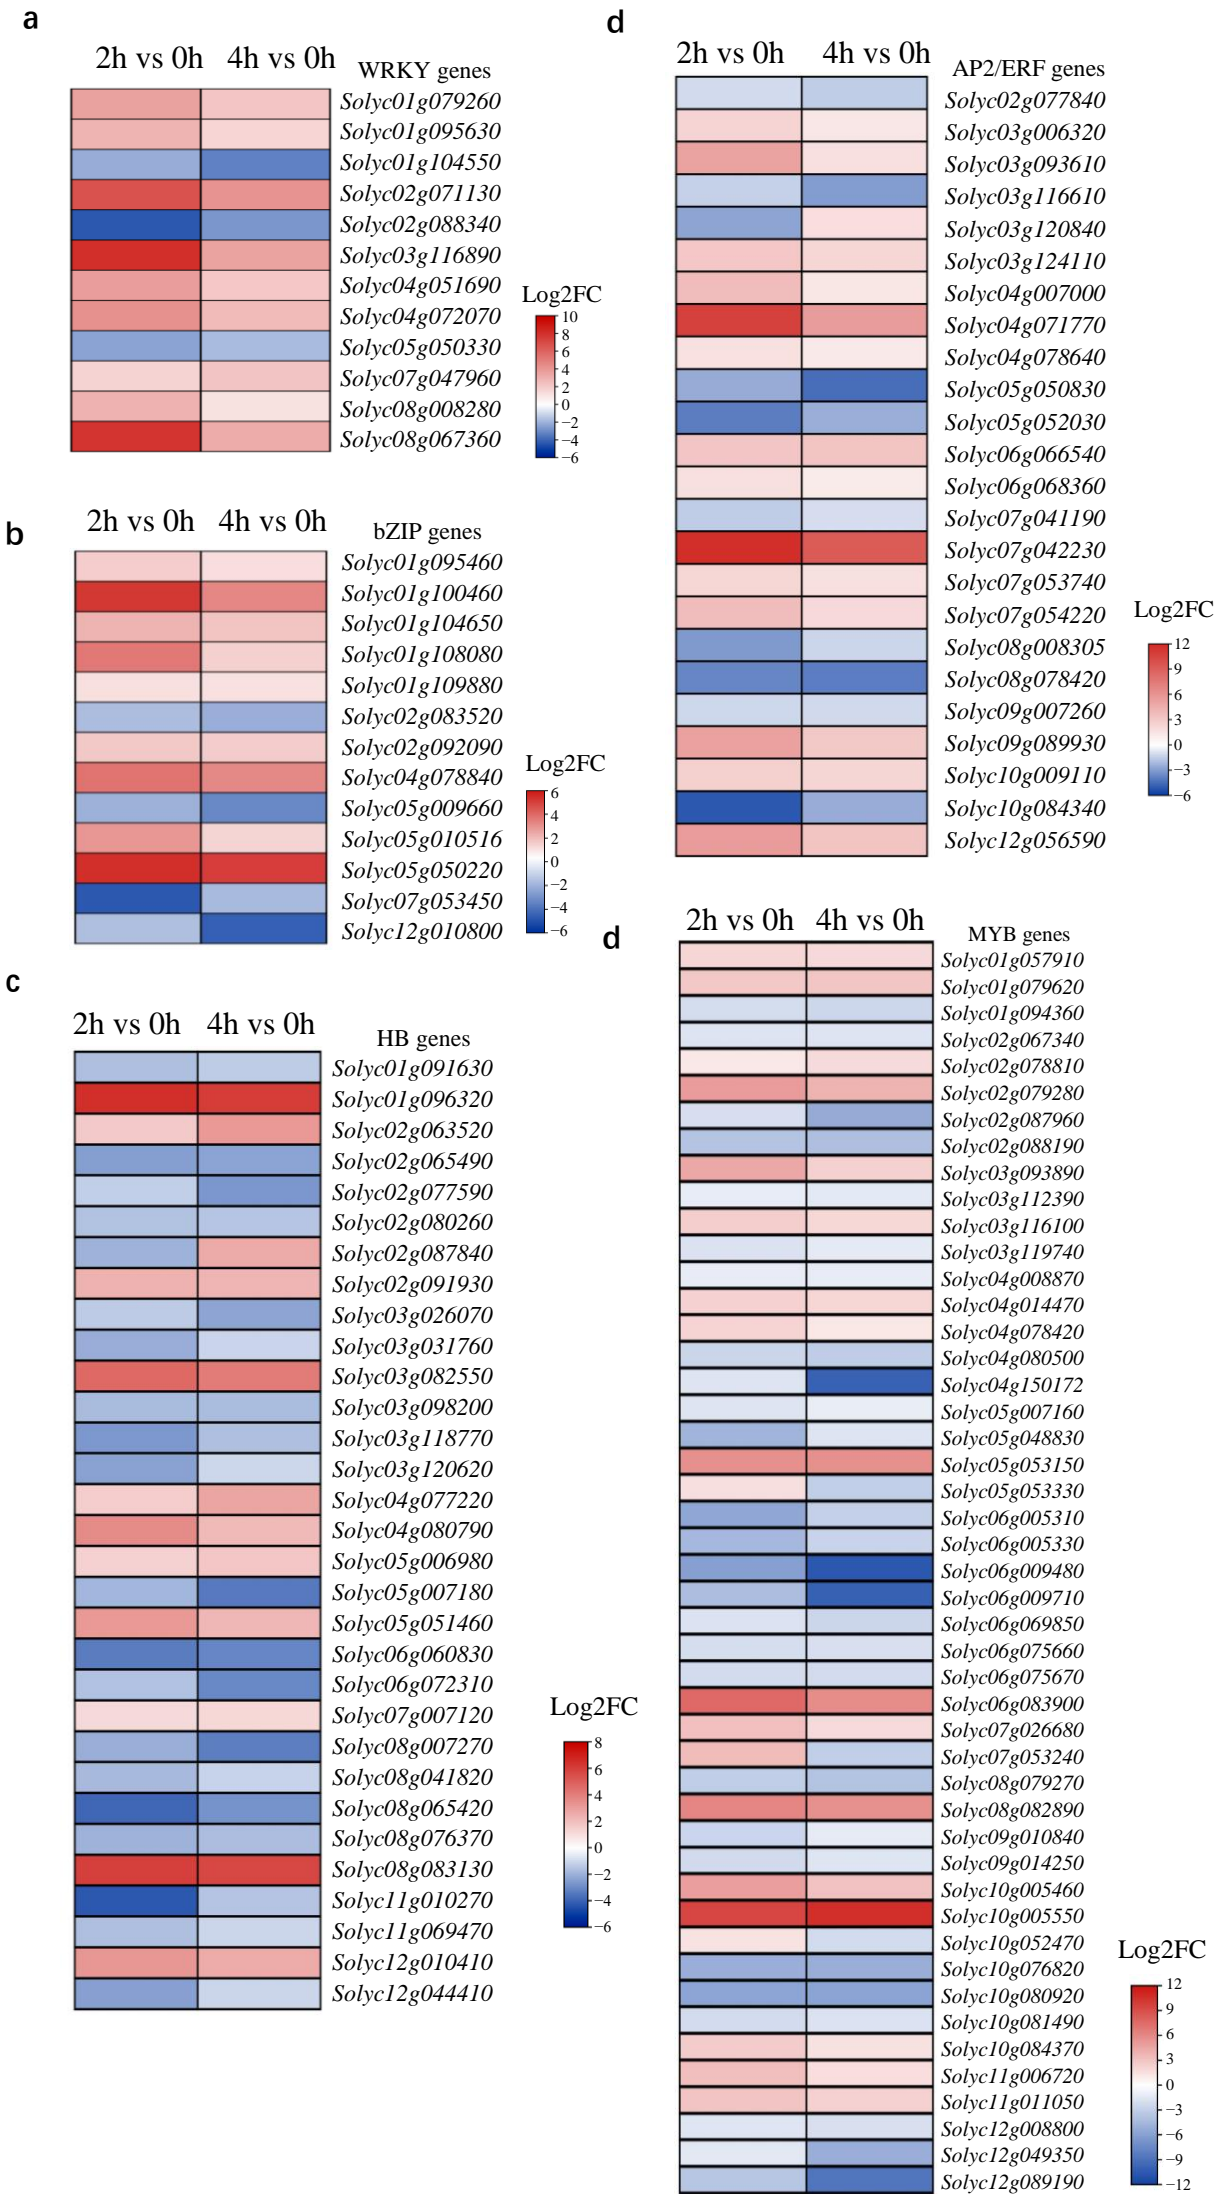

Figure S3

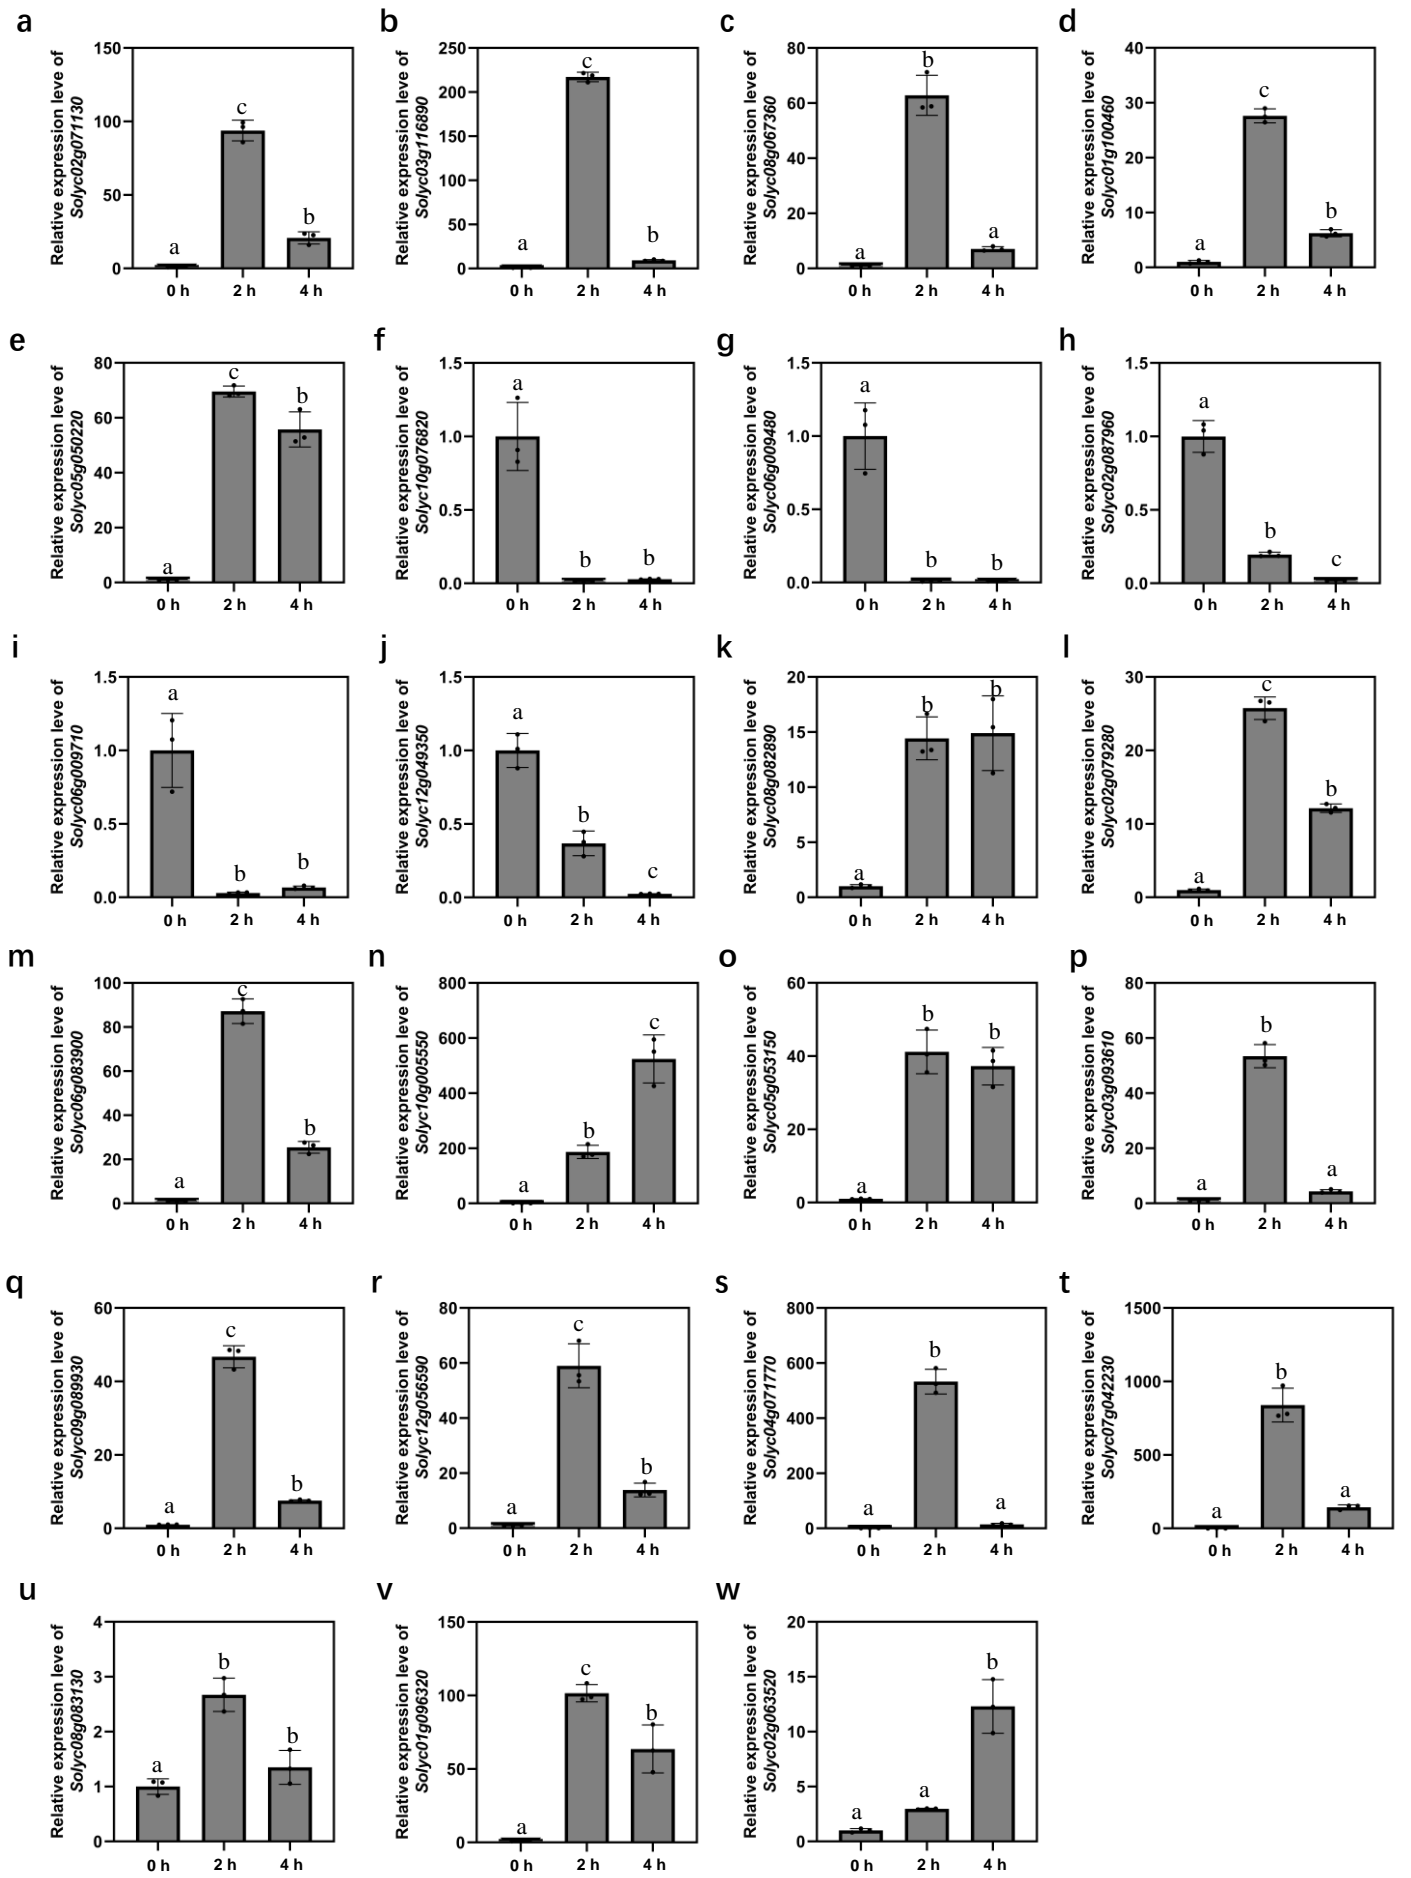

Figure S4

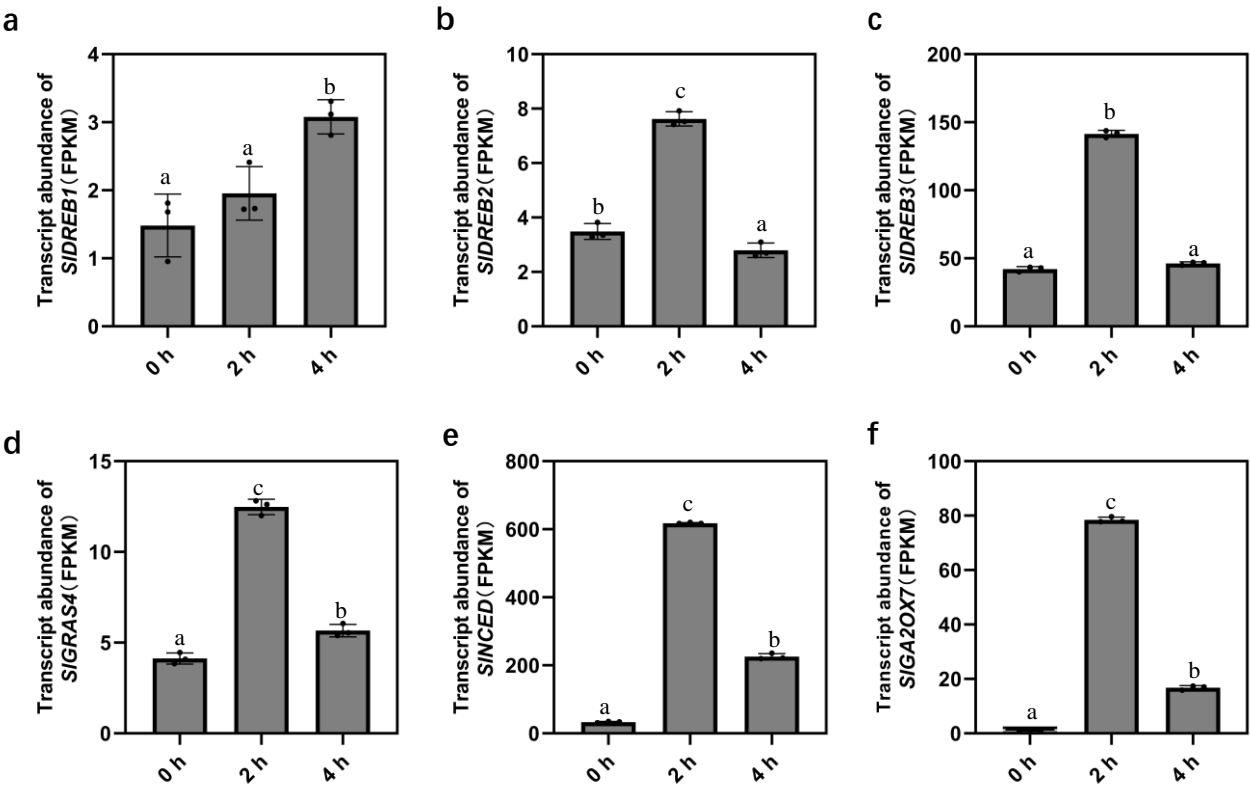

Supplement: s1 [file s1]
